# Supplementary material
Source: Springer Nature journal article supplement (https://www.springermedizin.de/resource/supplementary/12943_2010_760_MOESM8_ESM.pdf/9554756)

**A**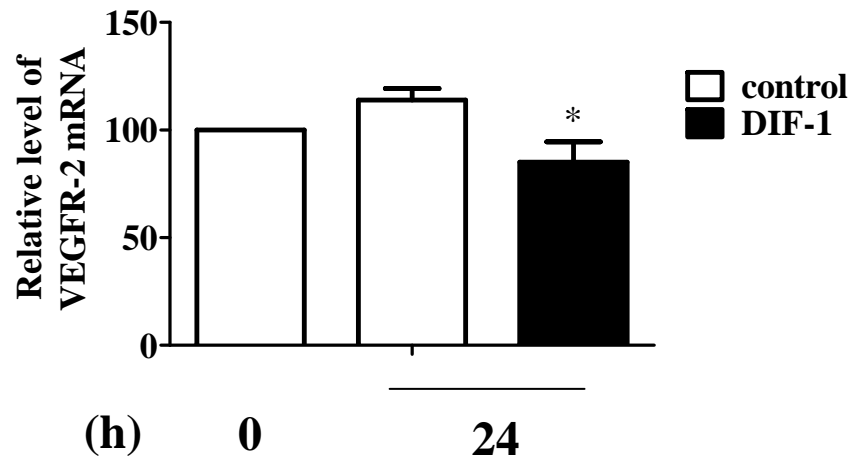**B**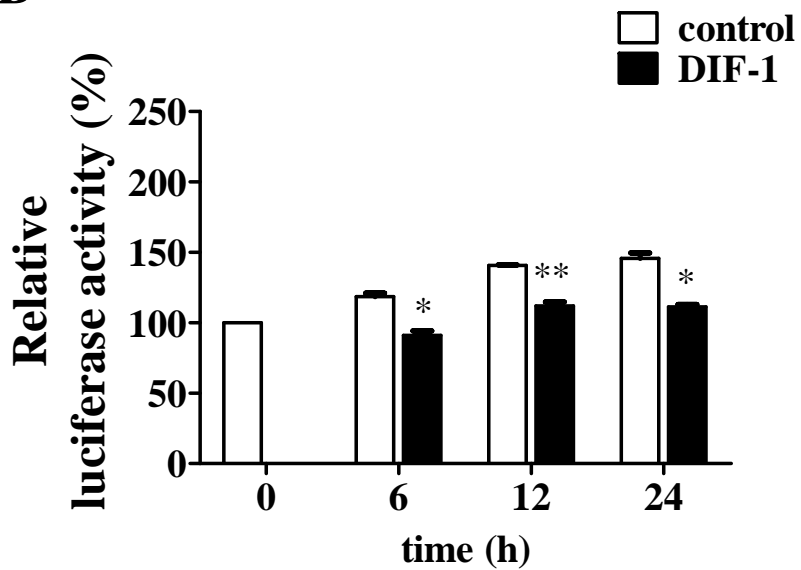**C**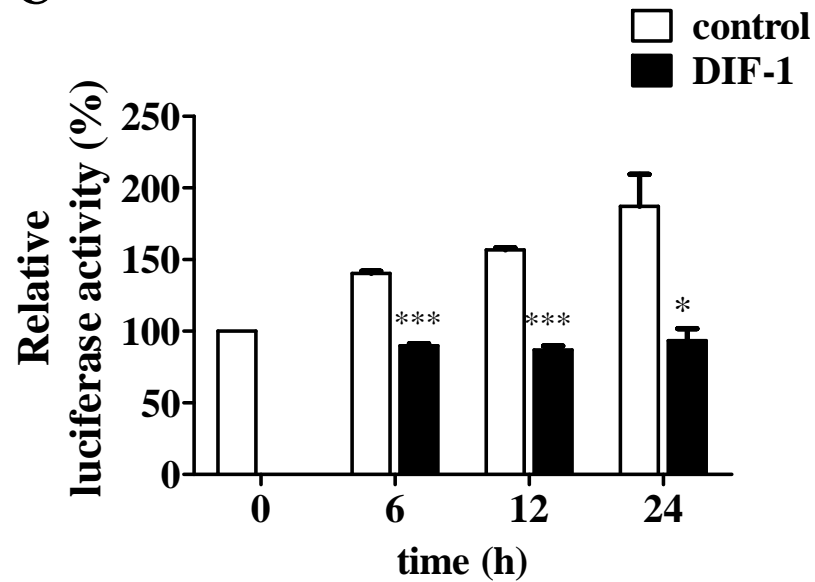

Supplement: MOESM8 [file 9554756]
